# Supplementary material
Source: MDPI journal article supplement (https://www.mdpi.com/2073-4344/9/11/931)
Supplement: s1 [file s1]

1 Supplementary Materials

## 2 A polypyrrole-modified Pd-Ag bimetallic electrode 3 for the electrocatalytic reduction of 4-chlorophenol

4 Xuefeng Wei <sup>1,\*</sup>, Laiyuan Zeng <sup>1</sup>, Weiwei Lu <sup>1,\*</sup>, Juan Miao <sup>1,2</sup>, Ruichang Zhang <sup>1,2</sup>, Ming Zhou <sup>1,2</sup>  
5 and Jun Zhang <sup>1</sup>

6 <sup>1</sup> College of Chemical Engineering & Pharmaceutics, Henan University of Science and Technology, Luoyang  
7 471023, P.R. China

8 <sup>2</sup> Luoyang Key Laboratory of Soil Pollution Remediation Project, Henan University of Science and  
9 Technology, Luoyang 471023, P.R. China

10 \* Correspondence: [xfwei@haust.edu.cn](mailto:xfwei@haust.edu.cn) (X.W.); [luweiwei@haust.edu.cn](mailto:luweiwei@haust.edu.cn) (W.L.); Tel.: +86-379-6423-1914 (X.W.);  
11 Fax: +86-379-6562-7502 (X.W.)

### 12 Table of contents

13 **Figure S1** EDS spectra of Pd-Ag/PPy/Ti electrode.

14 **Figure S2** The Arrhenius plot of  $\ln k$  and  $1/T$  of 4-CP dechlorination.

15 **Figure S3** Schematic diagram of electrocatalytic hydrodechlorination equipment.

16 **Table S1** The pH value of catholyte before and after dechlorination process.

### 17 1. EDS analysis of electrode

18 The energy-dispersive spectrometer (EDS) was employed to investigate the elemental  
19 composition of prepared Pd-Ag/PPy/Ti electrode (shown in Figure S1), which confirmed palladium  
20 and silver were successfully deposited on the titanium substrate.

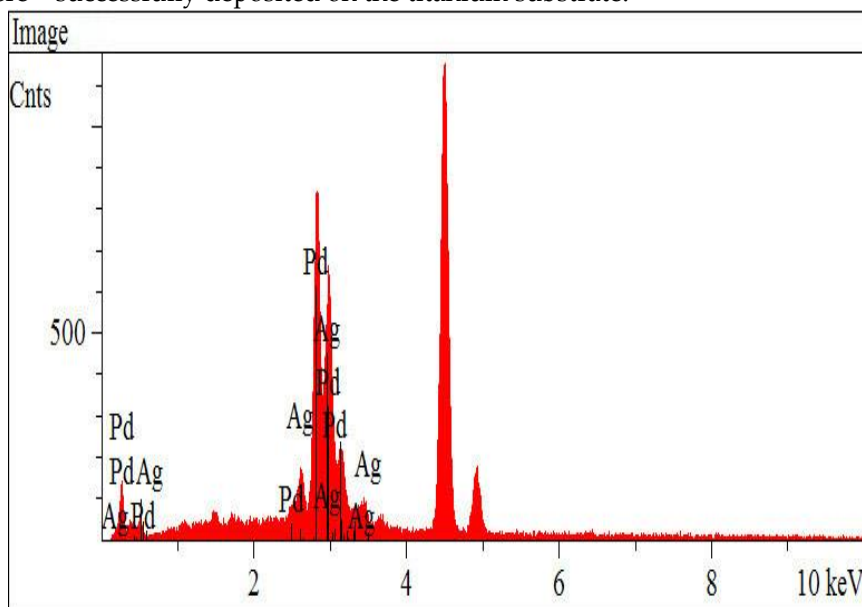

21  
22 **Figure S1.** EDS spectra of Pd-Ag/PPy/Ti electrode.

### 23 2. The Arrhenius plot of $\ln k$ and $1/T$ of 4-CP dechlorination

24 The effect of temperature on the ECH of 4-CP could be expressed by the Arrhenius mequation:  
25  $k=A\exp(-Ea/RT)$ . The apparent reaction rate constant  $k$  and  $1/T$  are related by the following formula:  
26  $\ln k=15.93157-5972.96/T$  ( $R^2=0.9334$ ). The corresponding fitted line is shown in Figure S2.

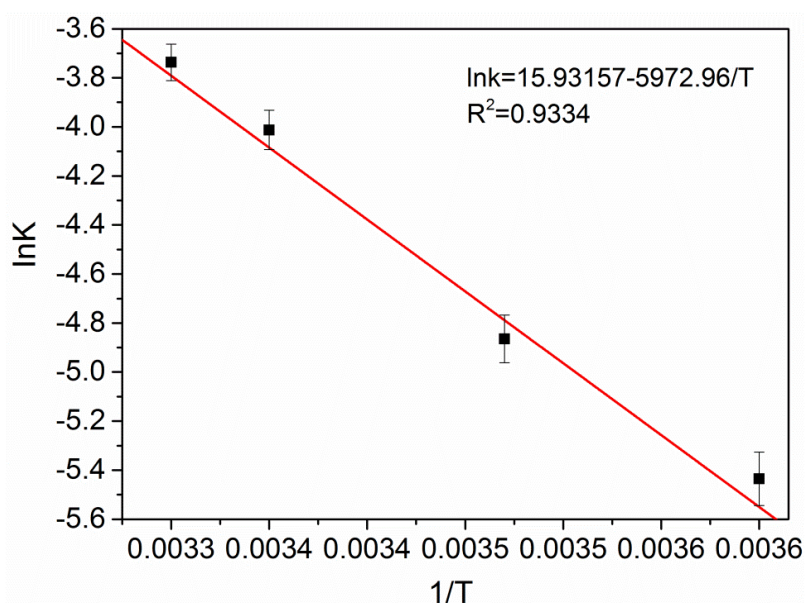

27

28

Figure S2. The Arrhenius plot of  $\ln k$  and  $1/T$  of 4-CP dechlorination.

29

### 3. The experimental equipment of dechlorination

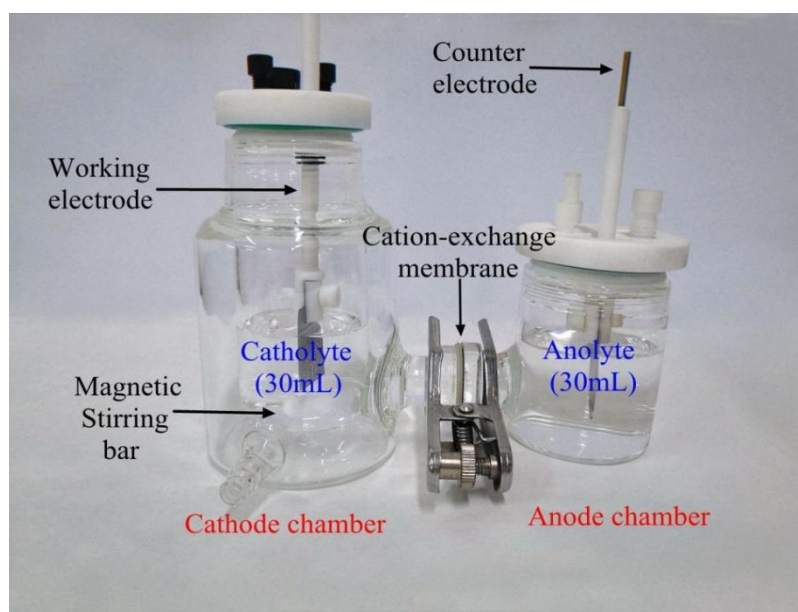

30

31

Figure S3. Schematic diagram of electrocatalytic hydrodechlorination equipment.

32

### 4. Comparison of catholyte before and after dechlorination process

33

34

The process of electrocatalytic hydrogenation dechlorination consumes  $H^+$ , and the pH values vary obviously before and after dechlorination, which was shown in Table S1.

35

36

**Table S1.** The pH value of catholyte before and after dechlorination process.  $I = 6 \text{ mA}$ ,  $t = 90 \text{ min}$ ,  $C_0 = 100 \text{ mg/L}$ ,  $C_{Na_2SO_4} = 0.05 \text{ mol/L}$ .

|         | pH value |      |      |      |
|---------|----------|------|------|------|
| Initial | 2.05     | 2.30 | 2.40 | 6.48 |

|          |      |      |       |       |
|----------|------|------|-------|-------|
| Terminal | 2.93 | 8.40 | 11.10 | 12.72 |
|----------|------|------|-------|-------|

---
